# Supplementary material
Source: publisher site journal article supplement (https://www.dovepress.com/get_supplementary_file.php?f=314491.xlsx)
Supplement: Supplementary file 1 [file get_supplementary_file.php]

## Sheet: data
	Patient data			Nasopharyngeal swab samples				Saliva samples
No.	Code	Sex	Age	NP sample collection date	ORF1ab gene, Ct	Test Result	Column2	Saliva sample collection date	ORF1ab & S genes, Ct	RPP, Ct	Test Result2	Viral Score	Viral Score Level	Shortness of breath2	Fever	Cough	Fatigue	Digestive dysfunction	Other	Comments
1	BST113	female	30	2020-10-22	-	Negative		2020-10-22	-	29.51	Negative	-	-	0	0	0	0	0	0	-
2	BST189	female	56	2020-10-30	15.66	Positive		2020-10-30	22.45	28.19	Positive	15.74	Medium	0	0	0	0	0	0	-
3	BST199	female	29	2020-10-30	18.05	Positive		2020-10-30	22.64	30.93	Positive	18.29	Medium	0	0	0	0	0	0	-
4	BST198	female	53	2020-10-30	17.52	Positive		2020-10-30	17.48	32.19	Positive	24.71	High	0	0	0	0	0	0	-
5	BST140	female	55	2020-10-30	-	Negative		2020-10-30	-	31.9	Negative	-	-	0	0	0	0	0	0	-
6	BST179	female	25	2020-10-30	-	Negative		2020-10-30	-	31.72	Negative	-	-	0	0	0	0	0	0	-
7	BST192	female	26	2020-10-30	-	Negative		2020-10-30	-	27.9	Negative	-	-	0	0	0	0	0	0	-
8	BST157	male	25	2020-10-30	-	Negative		2020-10-30	-	29.81	Negative	-	-	0	0	0	0	0	0	-
9	BST131	male	26	2020-10-30	-	Negative		2020-10-30	-	31.38	Negative	-	-	0	0	0	0	0	0	-
10	BST137	female	55	2020-10-30	-	Negative		2020-10-30	-	28.8	Negative	-	-	0	0	0	0	0	0	-
11	BST136	female	49	2020-10-30	-	Negative		2020-10-30	-	30.38	Negative	-	-	0	0	0	0	0	0	-
12	BST122	male	27	2020-10-30	-	Negative		2020-10-30	-	32.64	Negative	-	-	0	0	0	0	0	0	-
13	BST144	male	36	2020-10-30	-	Negative		2020-10-30	-	29.97	Negative	-	-	0	0	0	0	0	0	-
14	BST184	female	20	2020-10-30	-	Negative		2020-10-30	-	30.32	Negative	-	-	0	0	0	0	0	0	-
15	BST196	female	31	2020-10-30	-	Negative		2020-10-30	-	32.82	Negative	-	-	0	0	0	0	0	0	-
16	BST174	female	22	2020-10-30	-	Negative		2020-10-30	-	30.69	Negative	-	-	0	0	0	0	0	0	-
17	BST146	female	37	2020-10-30	-	Negative		2020-10-30	-	30.53	Negative	-	-	0	0	0	0	0	0	-
18	BST133	female	43	2020-10-30	-	Negative		2020-10-30	-	30.4	Negative	-	-	0	0	0	0	0	0	-
19	BST114	male	27	2020-10-30	-	Negative		2020-10-30	-	32.07	Negative	-	-	0	0	0	0	0	0	-
20	BST115	female	45	2020-10-30	-	Negative		2020-10-30	-	32.66	Negative	-	-	0	0	0	0	0	0	-
21	BST128	female	26	2020-10-30	-	Negative		2020-10-30	-	28.48	Negative	-	-	0	0	0	0	0	0	-
22	BST120	female	44	2020-10-30	-	Negative		2020-10-30	-	29.98	Negative	-	-	0	0	0	0	0	0	-
23	BST135	female	61	2020-10-30	-	Negative		2020-10-30	-	28.73	Negative	-	-	0	0	0	0	0	0	-
24	BST165	male	27	2020-10-30	-	Negative		2020-10-30	-	36.89	Negative	-	-	0	0	0	0	0	0	-
25	BST185	female	57	2020-10-30	-	Negative		2020-10-30	-	33.78	Negative	-	-	0	0	0	0	0	0	-
26	BST141	female	42	2020-10-30	-	Negative		2020-10-30	-	29.46	Negative	-	-	0	0	0	0	0	0	-
27	BST116	female	49	2020-10-30	-	Negative		2020-10-30	-	29.89	Negative	-	-	0	0	0	0	0	0	-
28	BST190	female	47	2020-10-30	-	Negative		2020-10-30	-	29.58	Negative	-	-	0	0	0	0	0	0	-
29	BST138	male	30	2020-10-30	-	Negative		2020-10-30	-	35.91	Negative	-	-	0	0	0	0	0	0	-
30	BST153	female	58	2020-10-30	-	Negative		2020-10-30	-	30.54	Negative	-	-	0	0	0	0	0	0	-
31	BST200	male	28	2020-10-30	-	Negative		2020-10-30	-	30.1	Negative	-	-	0	0	0	0	0	0	-
32	BST154	male	19	2020-11-02	22.51	Positive		2020-11-02	25.96	32.89	Positive	16.93	Medium	0	0	0	0	0	0	-
33	BST170	male	51	2020-11-02	21.86	Positive		2020-11-02	22.53	29.76	Positive	17.23	Medium	0	0	0	0	0	0	-
34	BST149	female	40	2020-11-02	18.28	Positive		2020-11-02	21.54	30.35	Positive	18.81	Medium	0	0	0	0	0	0	-
35	BST162	female	24	2020-11-02	20.14	Positive		2020-11-02	23.21	29.42	Positive	16.21	Medium	0	0	0	0	0	0	-
36	BST148	female	29	2020-11-03	-	Negative		2020-11-03	-	28.2	Negative	-	-	0	0	0	0	0	0	-
37	BST194	female	25	2020-11-02	-	Negative		2020-11-02	-	29.68	Negative	-	-	0	0	0	0	0	0	-
38	BST163	female	28	2020-11-02	-	Negative		2020-11-02	-	29.67	Negative	-	-	0	0	0	0	0	0	-
39	BST145	female	43	2020-11-02	-	Negative		2020-11-02	-	29.97	Negative	-	-	0	0	0	0	0	0	-
40	BST160	male	22	2020-11-02	-	Negative		2020-11-02	-	29.21	Negative	-	-	0	0	0	0	0	0	-
41	BST156	male	27	2020-11-02	-	Negative		2020-11-02	-	29.42	Negative	-	-	0	0	0	0	0	0	-
42	BST125	female	25	2020-11-02	-	Negative		2020-11-02	-	30.29	Negative	-	-	0	0	0	0	0	0	-
43	BST147	female	25	2020-11-02	-	Negative		2020-11-02	-	28.78	Negative	-	-	0	0	0	0	0	0	-
44	BST126	female	26	2020-11-02	-	Negative		2020-11-02	-	28.72	Negative	-	-	0	0	0	0	0	0	-
45	BST195	male	25	2020-11-02	-	Negative		2020-11-02	-	30.3	Negative	-	-	0	0	0	0	0	0	-
46	BST187	female	58	2020-11-02	-	Negative		2020-11-02	-	32.66	Negative	-	-	0	0	0	0	0	0	-
47	BST180	female	24	2020-11-02	-	Negative		2020-11-02	-	30.69	Negative	-	-	0	0	0	0	0	0	-
48	BST169	male	15	2020-11-02	-	Negative		2020-11-02	-	31.35	Negative	-	-	0	0	0	0	0	0	-
49	BST142	female	18	2020-11-02	-	Negative		2020-11-02	28.58	29.69	Positive	11.11	Low	0	0	0	0	0	0	Patient had COVID-19 antibody test but IgM and IgG were not detected. Patient had symptoms 10 days before PCR test was performed and COVID-19 contact before feeling the symptoms.
50	BST168	male	26	2020-11-02	-	Negative		2020-11-02	-	33.18	Negative	-	-	0	0	0	0	0	0	-
51	BST129	female	25	2020-11-02	-	Negative		2020-11-02	-	29.83	Negative	-	-	0	0	0	0	0	0	Patient had COVID-19 antibody test but IgM and IgG were not detected. Patient had COVID-19 contact but no symptoms.
52	BST117	female	61	2020-11-02	-	Negative		2020-11-02	-	29.8	Negative	-	-	0	0	0	0	0	0	-
53	BST178	female	25	2020-11-02	-	Negative		2020-11-02	-	29.92	Negative	-	-	0	0	0	0	0	0	-
54	BST172	male	43	2020-11-02	-	Negative		2020-11-02	-	31.62	Negative	-	-	0	0	0	0	0	0	-
55	BST182	female	50	2020-11-03	-	Negative		2020-11-04	-	30.53	Negative	-	-	0	0	0	0	0	0	-
56	BST013	male	52	2020-11-04	17.77	Positive		2020-11-05	18.53	29.08	Positive	20.55	Medium	1	1	1	1	1	0	-
57	BST015	female	30	2020-11-03	23.8	Positive		2020-11-05	35.91	29.29	Positive	3.38	Low	0	0	0	0	0	1	Other symptoms include runny nose.
58	BST012	male	45	2020-11-03	33.07	Positive		2020-11-04	21.76	27.31	Positive	15.55	Medium	0	1	0	1	1	0	-
59	BST014	male	80	2020-11-11	16.25	Positive		2020-11-12	19.4222	28.6252	Positive	19.203	Medium	1	1	1	0	0	0	-
60	BST017	male	61	2020-11-09	19.93	Positive		2020-11-10	15.2994	29.9324	Positive	24.633	High	1	1	1	0	0	1	Other symptoms include muscle and joint pain.
61	BST018	male	77	2020-11-09	17.84	Positive		2020-11-10	10.6852	24.1411	Positive	23.4559	High	0	1	0	1	1	0	-
62	BST019	male	38	2020-11-09	23.18	Positive		2020-11-11	20.0275	29.5073	Positive	19.4797	Medium	1	0	1	1	0	0	-
63	BST020	male	69	2020-11-10	24.44	Positive		2020-11-11	17.8384	32.4417	Positive	24.6032	High	1	1	1	0	0	0	-
64	BST022	female	83	2020-11-11	26	Positive		2020-11-12	26.3132	33.7108	Positive	17.3976	Medium	1	1	1	1	1	0	-
65	BST016	male	69	2020-11-17	34,60	Positive		2020-11-18	25.03	29.4	Positive	14.37	Medium	1	1	1	1	0	0	-
66	BST021	male	82	2020-11-17	22,68	Positive		2020-11-19	17.19	31.8	Positive	24.61	High	1	1	0	1	0	1	Other symptoms include vertigo.
67	BST023	male	70	-	13.33	Positive		2020-11-19	8.08	31.333	Positive	33.253	High	0	0	0	1	0	1	Other symptoms include difficulty moving left leg and left arm.
68	BST024	female	47	2020-11-18	19.27	Positive		2020-11-20	17.56	28.97	Positive	21.41	High	0	0	1	1	1	1	Other symptoms include vertigo.
69	BST025	female	75	2020-11-23	16.13	Positive		2020-11-24	20.84	26.15	Positive	15.31	Medium	1	1	0	1	0	0	-
70	BST027	female	79	2020-11-25	23.96	Positive		2020-11-27	26.99	29.22	Positive	12.23	Medium	0	0	0	1	0	0	-
71	BST033	male	59	2020-11-29	35.86	Positive		2020-12-01	27.42	27.82	Positive	10.4	Low	1	1	0	0	0	0	-
72	BST026	female	80	2020-12-03	24.8	Positive		2020-12-04	29.62	29.31	Positive	9.69	Low	0	0	0	1	0	0	-
73	BST029	male	62	2020-12-03	27.4	Positive		2020-12-04	32.68	28.88	Positive	6.2	Low	0	0	0	0	1	1	Other symptoms include runny nose and elevated heart rate.
74	BST030	male	45	2020-11-30	23.38	Positive		2020-12-02	32.17	29.84	Positive	7.67	Low	0	1	1	1	1	0	-
75	BST043	male	32	2020-12-03	18.25	Positive		2020-12-04	13.31	26.43	Positive	23.12	High	0	0	0	1	0	1	Other symptoms include feeling chills.
76	BST035	female	79	2020-12-09	24.3	Positive		2020-12-10	35.27	31.88	Positive	6.61	Low	1	1	1	0	0	0	-
77	BST038	male	79	2020-12-05	27.37	Positive		2020-12-07	23.23	28.88	Positive	15.65	Medium	1	0	0	1	0	0	-
78	BST034	male	73	2020-12-15	26.35	Positive		2020-12-16	17.96	27.31	Positive	19.35	Medium	1	1	1	0	0	1	Other symptoms include sore throat.
79	BST037	female	80	2020-12-20	32.35	Positive		2020-12-21	33.66	27.03	Positive	3.37	Low	0	0	1	1	0	1	Other symptoms include chest pain.
80	BST031	female	69	2020-12-21	23.38	Positive		2020-12-22	24.68	26.99	Positive	12.31	Medium	0	1	1	1	1	0	-
81	BST036	male	59	2020-12-18	20.65	Positive		2020-12-22	30.94	-	Positive	19.06	Medium	0	1	1	1	0	0	-
82	BST039	male	72	2021-01-03	27.35	Positive		2021-01-04	27.9181	29.3037	Positive	11.3856	Low	1	0	0	1	0	0	-
83	BST040	female	67	2020-12-28	25.91	Positive		2020-12-30	31.9775	28.2091	Positive	6.23159	Low	1	0	0	1	1	1	Other symptoms include taste loss.
84	BST041	male	61	2021-01-04	26.38	Positive		2021-01-05	20.6667	27.3158	Positive	16.649	Medium	1	0	1	1	0	0	-
85	BST042	male	80	2021-01-07	18.57	Positive		2021-01-08	13.6037	25.8733	Positive	22.2696	High	0	0	0	1	1	0	-
86	BST028	female	72	2021-01-11	26.92	Positive		2021-01-12	22.27	29.22	Positive	16.95	Medium	1	1	0	0	0	0	-
87	BST032	male	77	2021-01-20	19.21	Positive		2021-01-20	18.21	26.96	Positive	18.75	Medium	1	1	0	1	0	0	-
88	BST048	male	57	2021-01-12	19.42	Positive		2021-01-14	22.02	26.56	Positive	14.54	Medium	1	0	0	0	0	1	Other symptoms include chest discomfort.
89	BST044	female	78	2021-01-26	6.22	Positive		2021-01-27	16.9726	25.8841	Positive	18.9115	Medium	0	0	0	1	0	1	Other symptoms include headache.
90	BST045	female	85	2021-01-23	17.93	Positive		2021-01-25	21.4044	25.8832	Positive	14.4788	Medium	0	0	0	1	0	1	Other symptoms include fainting.
91	BST046	male	68	2021-01-23	9.3	Positive		2021-01-25	27.2191	26.5423	Positive	9.32322	Low	0	0	0	1	0	1	Other symptoms include difficulty moving right leg and right arm, disorganized speech.
92	BST049	male	77	2021-01-26	12.04	Positive		2021-01-29	19.4152	28.2934	Positive	18.8782	Medium	1	0	1	0	0	0	-
93	BST050	male	63	2021-01-27	12.3	Positive		2021-01-29	20.4471	27.4134	Positive	16.9663	Medium	0	1	1	1	0	1	Other symptoms include feeling chills, sore throat, chest pain.
94	BST101	female	29	2021-01-28	-	Negative		2021-01-28	-	28.3077	Negative	-	-	0	0	0	0	0	0	-
95	BST102	female	26	2021-01-28	-	Negative		2021-01-28	-	28.6158	Negative	-	-	0	0	0	0	0	0	-
96	BST103	female	37	2021-01-28	-	Negative		2021-01-28	-	27.151	Negative	-	-	0	0	0	0	0	0	-
97	BST106	female	26	2021-01-28	-	Negative		2021-01-28	-	28.7134	Negative	-	-	0	0	0	0	0	0	-
98	BST107	male	28	2021-01-28	-	Negative		2021-01-28	-	27.6173	Negative	-	-	0	0	0	0	0	0	-
99	BST055	male	67	2021-02-01	15.99	Positive		2021-02-03	16.9	30.1	Positive	23.2	High	0	0	1	1	0	0	-
100	BST089	female	81	2021-02-02	6.25	Positive		2021-02-03	11.85	27	Positive	25.15	High	1	0	0	0	0	0	-
101	BST091	female	71	2021-02-02	20.57	Positive		2021-02-03	28.16	30.21	Positive	12.05	Medium	1	1	1	1	1	1	Other symptoms include feeling chills, vertigo, muscle cramp.
102	BST051	male	66	2021-02-08	32.84	Positive		2021-02-09	32.0466	28.4624	Positive	6.41577	Low	0	1	1	1	0	1	Other symptoms include headache, sore throat, chest pain, stuffy nose, hyperesthesia, painful urination.
103	BST058	male	67	2021-02-09	9.66	Positive		2021-02-11	13.9962	26.7295	Positive	22.7333	High	0	1	0	1	1	0	-
104	BST062	male	51	2021-02-10	28.55	Positive		2021-02-11	27.4323	29.9373	Positive	12.505	Medium	1	1	0	1	0	0	-
105	BST063	female	64	2021-02-13	12.43	Positive		2021-02-15	21.7025	27.1563	Positive	15.4538	Medium	0	1	0	1	0	0	-
106	BST073	male	60	2021-02-09	19.49	Positive		2021-02-11	18.4598	28.5509	Positive	20.0911	Medium	0	0	0	1	1	0	-
107	BST083	male	57	2021-02-14	14.8	Positive		2021-02-15	-	29.7352	Negative	-	-	0	1	0	0	0	1	Other symptoms include feeling chills, headache, painful urination.
108	BST057	male	68	2021-02-16	7.99	Positive		2021-02-17	19.14	26.07	Positive	16.93	Medium	0	0	1	1	0	1	Other symptoms include runny nose, headache.
109	BST070	male	61	2021-02-16	28.3	Positive		2021-02-17	14.75	28.07	Positive	23.32	High	0	0	0	0	0	0	-
110	BST084	female	77	2021-02-15	27.21	Positive		2021-02-17	36.09	27.38	Positive	1.29	Low	0	0	0	1	0	0	-
111	BST090	female	36	2021-02-21	15.36	Positive		2021-02-22	18.06	27.02	Positive	18.96	Medium	0	0	0	0	0	0	-
